# Supplementary material for: The chemotactic swimming behavior of bird schistosome miracidia in the presence of compatible and incompatible snail hosts
Source: PeerJ. 2020 Jul 16;8:e9487. doi: 10.7717/peerj.9487 (PMC7369018; doi:10.7717/peerj.9487)
Supplement: Supplemental Information 1 — *- Control experiment [file peerj-08-9487-s001.xlsx]

## Sheet: Arkusz1
		Table SM1. Raw data for the experiment on chemotactic swimming behavior of Trichobilharzia regenti
		No of variant	No of series	Base arm	First arm	Second arm
		I*	1	4	3	3
			2	4	4	2
			3	4	3	3
		II	1	2	8	0
			2	1	9	0
			3	1	9	0
		III	1	1	8	1
			2	2	8	0
			3	1	8	1
		IV	1	5	4	1
			2	6	2	2
			3	9	1	0
		V	1	5	3	2
			2	2	6	2
			3	4	4	2
		VI	1	3	7	0
			2	5	2	3
			3	2	5	3
		VII	1	3	3	4
			2	3	6	1
			3	4	5	1
		*- Control experiment
